# Supplementary material
Source: PubMed Central journal article supplement (PMC4242886)
Supplement: 11606_2014_2878_MOESM1_ESM.pdf [file 11606_2014_2878_MOESM1_ESM.pdf]

## Online Appendix A: Search Strategy

Database: Ovid MEDLINE(R) <1946 to August Week 2 2012>, EBM Reviews - Cochrane Central Register of Controlled Trials <July 2012>, Ovid Healthstar <1966 to July 2012>

### Evidence Prioritization

- 1 (value adj2 information).mp.
- 2 priorit\*.mp.
- 3 exp health priorities/

### Evidence Generation

- 4 evidence generation.mp.
- 5 exp Randomized Controlled Trials as Topic/
- 6 Randomized Controlled Trials.mp.
- 7 exp Registries/
- 8 quasi experimental.mp.
- 9 mixed method\*.mp.
- 10 "delphi".mp.
- 11 "focus groups".mp.
- 12 exp Biomedical Research/
- 13 "Biomedical Research".mp.

### Evidence Synthesis

- 14 (evidence adj2 synthesis).mp.
- 15 exp Meta-Analysis as Topic/
- 16 Meta-Analysis.mp.
- 17 exp Review Literature as Topic/
- 18 Literature Review.mp.
- 19 systematic review.mp.

### Evidence Integration

- 20 exp cost benefit analysis/
- 21 cost benefit analysis.mp.
- 22 cost effective\*.mp.
- 23 exp Decision Support Techniques/
- 24 Decision Support Techniques.mp.
- 25 (evidence adj2 interpretation).mp.
- 26 (evidence adj2 integration).mp.

### Dissemination and Implementation

- 27 exp diffusion of innovation/
- 28 diffusion of innovation.mp.
- 29 dissemination.mp.
- 30 implementation.mp.

### Feedback and Assessment

- 31 exp Process Assessment/
- 32 Process Assessment.mp.
- 33 (outcomes, adj2 research).mp.
- 34 (outcome adj2 assessment).mp.
- 35 feedback.mp.

### Stakeholders

- 36 exp Consumer Participation/
- 37 "Consumer Participation".mp

38 stakeholder.mp.  
39 consumer.mp.  
40 customer.mp.  
41 citizen.mp.  
42 employer.mp.  
43 payer.mp.  
44 purchaser.mp.  
45 insurance.mp.  
46 policymaker\*.mp.  
47 policy maker.mp.  
48 pharmaceutical.mp  
49 exp drug industry/  
50 drug industry.mp.  
51 exp Government Agencies/  
52 Government Agenc\*.mp.  
53 key informant.mp.  
54 advocacy groups.mp.  
55 community advocat\*.mp.  
56 exp community based participatory research/  
57 community based participatory research.mp.  
58 exp community-institutional relations/  
59 community-institutional relations.mp.  
60 exp patient participation/  
61 patient participation.mp.  
62 community engag\*.mp.  
63 community advocat\*.mp.

#### PCOR and CER

64 exp care, patient centered/  
65 patient centered care.mp.  
66 collaborative partnership.mp.  
67 exp cooperative behavior/  
68 cooperative behavior.mp.  
69 patient perspective.mp.  
70 patient centered perspective.mp.  
71 patient-relevant outcome.mp.  
72 patient important outcome.mp.  
73 (responsive adj2 evaluation).mp.  
74 (responsive adj2 research).mp.  
75 exp comparative effectiveness research/  
76 comparative effect\*.mp.

#### Combinations

77 1 or 2 or 3 or 4 or 5 or 6 or 7 or 8 or 9 or 10 or 11 or 12 or 13 or 14 or 15 or 16 or 17 or 18 or 19 or 20 or 21 or 22  
or 23 or 24 or 25 or 26 or 27 or 28 or 29 or 30 or 31 or 32 or 33 or 34 or 35  
78 36 or 37 or 38 or 39 or 40 or 41 or 42 or 43 or 44 or 45 or 46 or 47 or 48 or 49 or 50 or 51 or 52 or 53 or 54 or 55  
or 56 or 57 or 58 or 59 or 60 or 61 or 62 or 63  
79 64 or 65 or 66 or 67 or 68 or 69 or 70 or 71 or 72 or 73 or 74 or 75 or 76  
80 77 and 78 and 79

#### Limits

81 limit 80 to english language  
82 limit 81 to yr="2003 -Current"  
83 limit 82 to humans
