# Supplementary material
Source: PubMed Central journal article supplement (PMC4242886)
Supplement: 11606_2014_2878_MOESM2_ESM.pdf [file 11606_2014_2878_MOESM2_ESM.pdf]

## Online Appendix B. Data Extraction Form

*Extractor Initials.* Use your first and last initial

*Author, Year.* First author, publication year

*Pubmed ID.* Found at the end of the pdf file name

*Name of journal*

### Preliminary Screening Questions

Answer the following four questions and follow the skip pattern instructions.

*Screening Q. 1. In what country did the study take place?*

- US
- Non- US

*Screening Q. 2. Mark the option that best describes this article*

- Stakeholder engaged research
- Synthesis of stakeholder engaged research

*Screening Q. 3. Is this article describing a research study?*

- Yes
- No (program report)

*Screening Q. 4. Does this article cover Research Stage 2-5? Stages 2-5 include: (2) Evidence generation, (3) evidence synthesis, (4) evidence interpretation, and (5) dissemination and application.*

- Yes
- No

### Program description

*What is the target population of this program?*

*Describe the program presented in this article.* Please provide brief description

### Basic Study Information

Complete the following questions, leaving no question blank.

- If No Data reported, write or select "ND"
- If Not Applicable, write or select "NA"

*1a. What was the research question or objective, as stated by the investigators? Copy and paste the research question and/or study objective, typically stated at the end of the introduction section.*

*1b. Describe the research question or objective for the study.* If including text from the actual article, please add quotations (" ")

*1c. What stage of research is this article reporting on? Choose the option that fits best.*

- Evidence Prioritization: establishing a vision and mission for research, identifying topics, setting priorities, and refining questions
- Evidence Generation: methods including clinical trials, practical trials, observational studies, etc.
- Evidence Synthesis: what is known, what is not known, and what methods have been used
- Evidence Interpretation and Integration: decision analysis, simulation modeling, cost-effectiveness analysis

- Dissemination and Application: active distribution of research findings to decision makers, adoption and implementation of research findings in real-world settings
- Feedback and Assessment: active review and revision of its processes over time
- Other:

2. *Study setting: Select the appropriate option.*

- Hospital
- Community
- Other Non-profit Organization
- Company
- ND
- NA
- Other:

3a. *Copy and paste relevant methodology description, as stated by the investigators.*

3b. *Describe the methods used in the study. Summarize content from 3a*

4. *What methods were used?*

- Qualitative (for example: interviews, focus groups, observation, ...)
- Quantitative (for example: survey, statistical analysis...)
- Mixed Methods
- ND
- NA
- Other:

5a. *What was the unit of analysis in this study? Unit of analysis refers to the 'what' or 'whom' being studied.*

- Patients
- Population (Public health), including community individuals
- Provider organizations (hospitals, health centers...)
- Clinicians
- Geographic / administrative boundaries (counties)
- ND
- NA
- Other:

5b. *Describe the study population. Describe baseline characteristics such as age, gender, income, etc.*

6. *Describe any interventions and comparators analyzed in the study.*

7. *List any outcomes analyzed in the study.*

### **Details of Stakeholder Engagement**

Complete the following questions, leaving no question blank.

- If No Data reported, write or select "ND"
- If Not Applicable, write or select "NA"

8a. *Were a priori targets identified prior to stakeholder recruitment? "A priori targets" are a pre-specified number of stakeholders within a stakeholder group or type. Please answer based on what is reported in the article.*

- Yes (Please describe in 8c)
- No

8b. *How were stakeholders recruited? Mark the option(s) that apply. If not reported, select ND. Provide details in question 8c.*

- Recruited through a personal or professional network (non-random)

- A random sample from the population
- ND: Recruitment strategy not specified
- Other:

8c. *What was the recruitment process for stakeholders?* Provide details from questions 8a and 8b. If not reported, write "ND".

9. *With which types of stakeholders have researchers reported engagement?*

- Patients (current)
- Public / Consumers (potential consumers of patient-centered health care and population-focused public health, their caregivers, families, and patient and consumer advocacy organizations)
- Providers (individual and organizations that provide care to patients and populations)
- Payers (Insurers, Medicare and Medicaid, state insurance exchanges, individuals with deductibles, and others responsible for reimbursement for interventions and episodes of care)
- Policy Makers ( The White House, Department of Health and Human Services, Congress, states, professional associations, intermediaries, and other policymaking entities )
- Product Makers (Drug and device manufacturers)
- Principle Investigators (Other researchers and their funders)
- Purchasers (Employers, the self-insured, government and other entities responsible for underwriting the costs of health care)
- Other:

10. *In what stages of research have researchers reported engagement with stakeholders?* If not sure, write description / possible answer under "other".

- Evidence Prioritization: establishing a vision and mission for research, identifying topics, setting priorities, and refining questions
- Evidence Generation: methods including clinical trials, practical trials, observational studies, etc.
- Evidence Synthesis: what is known, what is not known, and what methods have been used
- Evidence Interpretation and Integration: decision analysis, simulation modeling, cost-effectiveness analysis
- Dissemination and Application: active distribution of research findings to decision makers, adoption and implementation of research findings in real-world settings
- Feedback and Assessment: active review and revision of its processes over time
- Other:

11a. *Select the option(s) that best describe the programmatic role of stakeholders.* Select the best option and add details/description in Q11b.

- Investigator or co-investigators (might be referred as "partners" in CBPR)
- Staff
- Consultants
- Research subjects
- ND
- NA

11b. *Describe the level of engagement of stakeholders, as reported by the study authors.*

12. *Select the option that best describes the stakeholder participation in the study*

- Formulation of research question
- Defining essential characteristics of study participants, comparators and outcomes
- Monitoring of study conduct and progress
- Dissemination and implementation of research results

- Information obtained from stakeholders was used to inform other parts of the study (when stakeholders are subjects)
- Interpretation and analysis
- ND
- Other:

13a. *What modes of engagement have researchers reported?*

- Individual - Survey
- Individual - Key informant interview
- Individual - Other (specify on 13d)
- Group - Focus group
- Group - Panel (e.g. technical expert panel, consumer advisory board)
- Group - Other (specify on 13d)
- Public Review
- ND
- Other:

13b. *What were the mechanisms of interaction with stakeholders?*

- Face to face / in-person
- Telephone / teleconference
- Webinar / web-based interface
- e-mail / mail / fax
- ND
- Other:

13c. *How was the feedback from stakeholders synthesized?*

- Voting / Ranking methods
- Delphi method
- Quantitative survey methods
- Qualitative synthesis of written notes or transcripts / free text analysis / factor analysis
- Joint decision-making (e.g., when stakeholders are also staff or co-investigators)
- ND
- Other:

13d. *Describe the specific modes of stakeholder contact employed by the study.* Provide more details from Q. 13a-13c. If different strategies were used with different stakeholder groups, please specify/describe in the space below.

14. *What was the frequency and duration of contact with stakeholders?*

15. *At which point were the stakeholders engaged?* Select all that apply

- Before research
- During research
- After research was conducted
- NA- A research study was not conducted
- ND

16a. *Was a special provision reported for the engagement of patients, consumers and/or community members?* If patients were included on a stakeholder panel with other stakeholders, were they offered extra support for participation?

- Yes (Please specify in Q. 16b.)
- No
- NA – patients, consumers and community members were either not engaged or were engaged as the sole stakeholder group.

16b. *(If yes in Q.16a) Please select the option(s) that best describe the special provisions for patients / consumers.*

- Researchers provided Incentives for participation as stakeholders

- Researchers provided separate communication
- Meetings were separated from the other stakeholders
- Provided background literature or information
- ND
- NA
- Other:

*17a. Select the option(s) that best describe the any positive reported outcomes from engaging stakeholders in research. If none apply, please include under "other". Please describe in Q17b.*

- Made research relevant
- Increased understanding of research process
- Made research more transparent
- Improved research adoption
- Improved trust in research / researchers
- Mutual learning
- ND
- Other:

*17b. Describe, in your own words, any positive outcomes researchers reported from engaging stakeholders in research.*

*18. Describe any reported challenges or negative outcomes associated with the engagement of stakeholders in this research.*

**Thank you!** Please add your initials to the tracking sheet.

*19. Final comments from extractor. Use this space for any relevant comment related to the article, if not already included in form.*

*20. Use this space to include any questions or concerns regarding the form or information extracted.*
